# Supplementary material for: Uncovering the Anti-Angiogenic Mechanisms of Centella asiatica via Network Pharmacology and Experimental Validation
Source: MDPI journal article supplement (doi:10.3390/molecules29020362), 2024-01-11

# Uncovering the Anti-Angiogenic Mechanisms of *Centella Asiatica* via Network Pharmacology and Experimental Validation

Bingtian Zhao <sup>1,\*</sup>, Yuanyuan Li <sup>1</sup>, Binya Wang <sup>1</sup>, Jing Liu <sup>1</sup>, Yang Yang <sup>2,3</sup>, Qianghua Quan <sup>2,3</sup>, Quan An <sup>2,3</sup>, Rong Liang <sup>1</sup>, Chunhuan Liu <sup>1</sup> and Cheng Yang <sup>1,\*</sup>

<sup>1</sup> Key Laboratory of Synthetic and Biological Colloids, Ministry of Education, School of Chemical and Material Engineering, Jiangnan University, Wuxi 214122, P. R.China; liyuanyuan0918@163.com (Y.L.); dxsxyzs@163.com (B.W.); lj15735649029@163.com (J.L.); rongliang@jiangnan.edu.cn (R.L.); liuch@jiangnan.edu.cn (C.L.)  
<sup>2</sup> Yunnan Baiyao Group Shanghai Science & Technology Co., Ltd., Shanghai, 201100, P. R.China; doubleyoung75@163.com (Y.Y.); 18811781508@163.com (Q.Q.); ynbyanquan@sina.com (Q.A.)  
<sup>3</sup> East Asia Skin Health Research Center, Beijing 100037, P. R.China  
\* Correspondence: btzhao@jiangnan.edu.cn (B.Z.); cyang@jiangnan.edu.cn (C.Y.)

**Figure S1.** Six extracts (B1-B6) and five core components from CA inhibits the proliferation of HU-VECs compared to resveratrol as positive control.

| number | A1                                                                                  | A2                                                                                   | A3                                                                                    |
|--------|-------------------------------------------------------------------------------------|--------------------------------------------------------------------------------------|---------------------------------------------------------------------------------------|
| Normal | 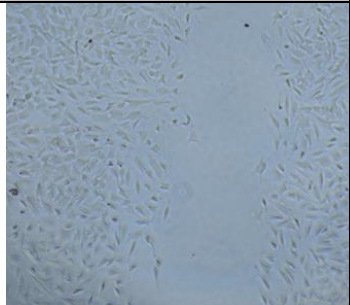  |   |   |
| M-VEGF |  |  |  |
| B1-Low |  |  |  |



|           |                                                                                     |                                                                                      |                                                                                       |
|-----------|-------------------------------------------------------------------------------------|--------------------------------------------------------------------------------------|---------------------------------------------------------------------------------------|
| B1-Middle | 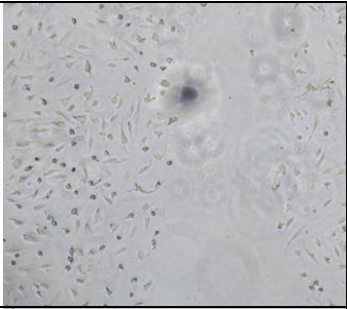   |    |    |
| B1-High   |    |    |    |
| B2-Low    |   |   |   |
| B2-Middle |  |  |  |
| B2-High   |  |  |  |
| B3-Low    |  |  |  |



|           |                                                                                     |                                                                                      |                                                                                       |
|-----------|-------------------------------------------------------------------------------------|--------------------------------------------------------------------------------------|---------------------------------------------------------------------------------------|
| B3-Middle | 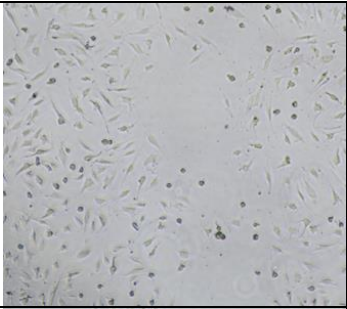   |    |    |
| B3-High   |    |    |    |
| B4-Low    |   |   |   |
| B4-Middle |  |  |  |
| B4-High   |  |  |  |
| B5-Low    |  |  |  |



|                  |                                                                                     |                                                                                      |                                                                                       |
|------------------|-------------------------------------------------------------------------------------|--------------------------------------------------------------------------------------|---------------------------------------------------------------------------------------|
| B5-Middle        | 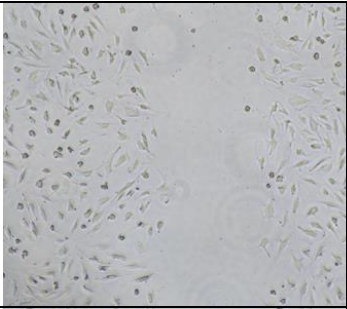   |    |    |
| B5-High          |    |    |    |
| B6-Low           |   |   |   |
| B6-Middle        |  |  |  |
| B6-High          |  |  |  |
| Asiaticoside-Low |  |  |  |



|                            |                                                                                     |                                                                                      |                                                                                       |
|----------------------------|-------------------------------------------------------------------------------------|--------------------------------------------------------------------------------------|---------------------------------------------------------------------------------------|
| Asiaticoside -<br>Middle   | 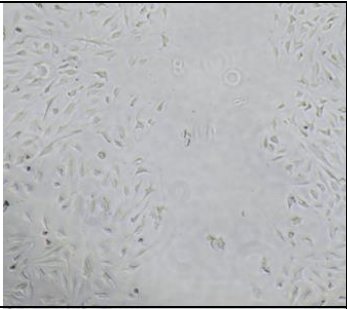   |    |    |
| Asiaticoside -High         |    |    |    |
| Asiaticoside B -<br>Low    |   |   |   |
| Asiaticoside B -<br>Middle |  |  |  |
| Asiaticoside B -<br>High   |  |  |  |
| Asiatic acid -Low          |  |  |  |



|                             |                                                                                     |                                                                                      |                                                                                       |
|-----------------------------|-------------------------------------------------------------------------------------|--------------------------------------------------------------------------------------|---------------------------------------------------------------------------------------|
| Asiatic acid -<br>Middle    | 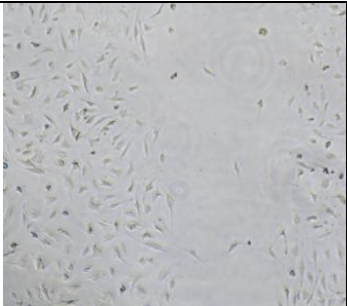   |    |    |
| Asiatic acid -High          |    |    |    |
| Madecassic acid -<br>Low    |   |   |   |
| Madecassic acid -<br>Middle |  |  |  |
| Madecassic acid -<br>High   |  |  |  |
| Madecassoside-Low           |  |  |  |



|                           |                                                                                     |                                                                                      |                                                                                       |
|---------------------------|-------------------------------------------------------------------------------------|--------------------------------------------------------------------------------------|---------------------------------------------------------------------------------------|
| Madecassoside -<br>Middle | 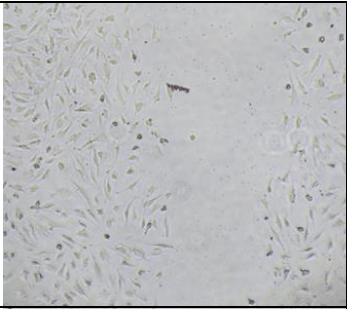   |    |    |
| Madecassoside -<br>High   |    |    |    |
| Rev-Low                   |   |   |   |
| Rev-Middle                |  |  |  |
| Rev-High                  |  |  |  |

**Figure S2.** Six extracts (B1-B6) and five core components from CA inhibit the vascular tube formation of HUVECs compared to resveratrol as a positive control.

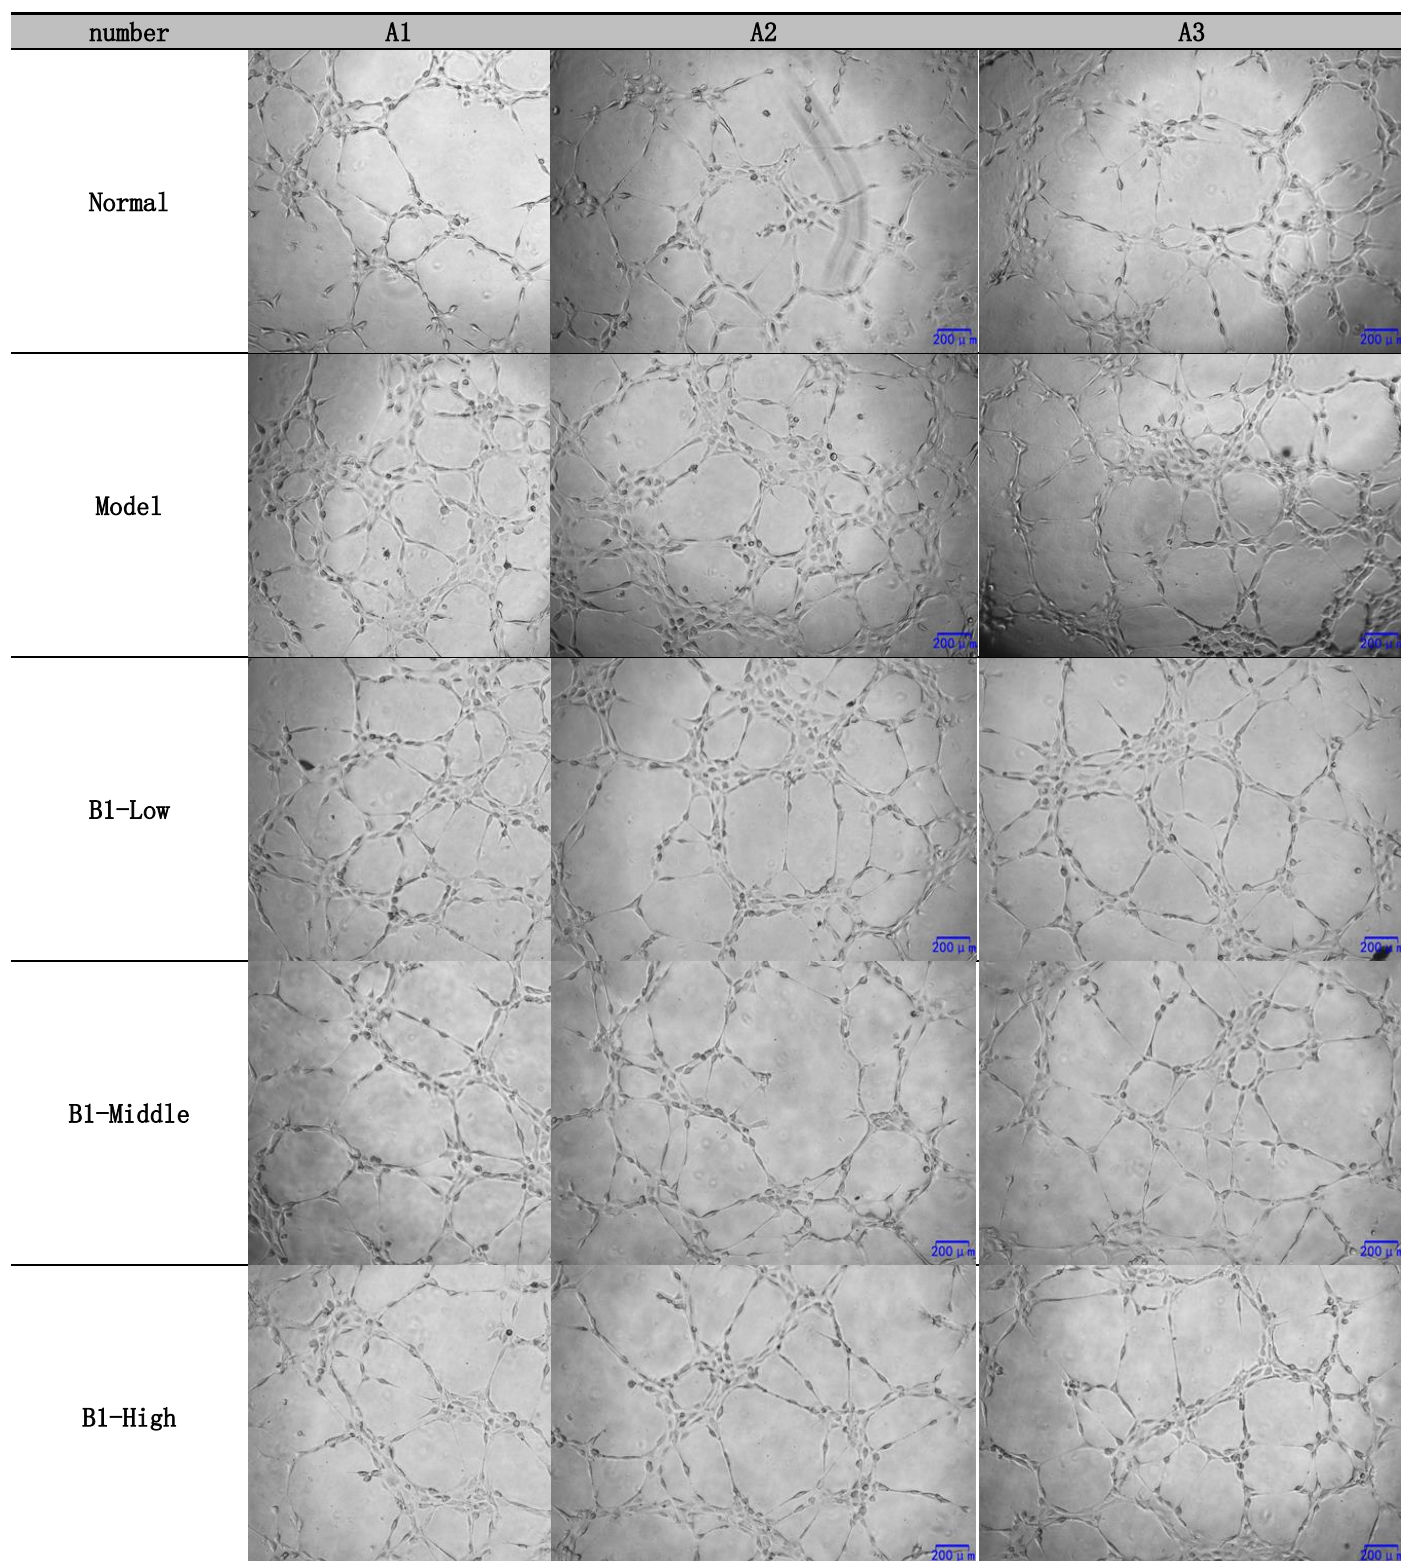



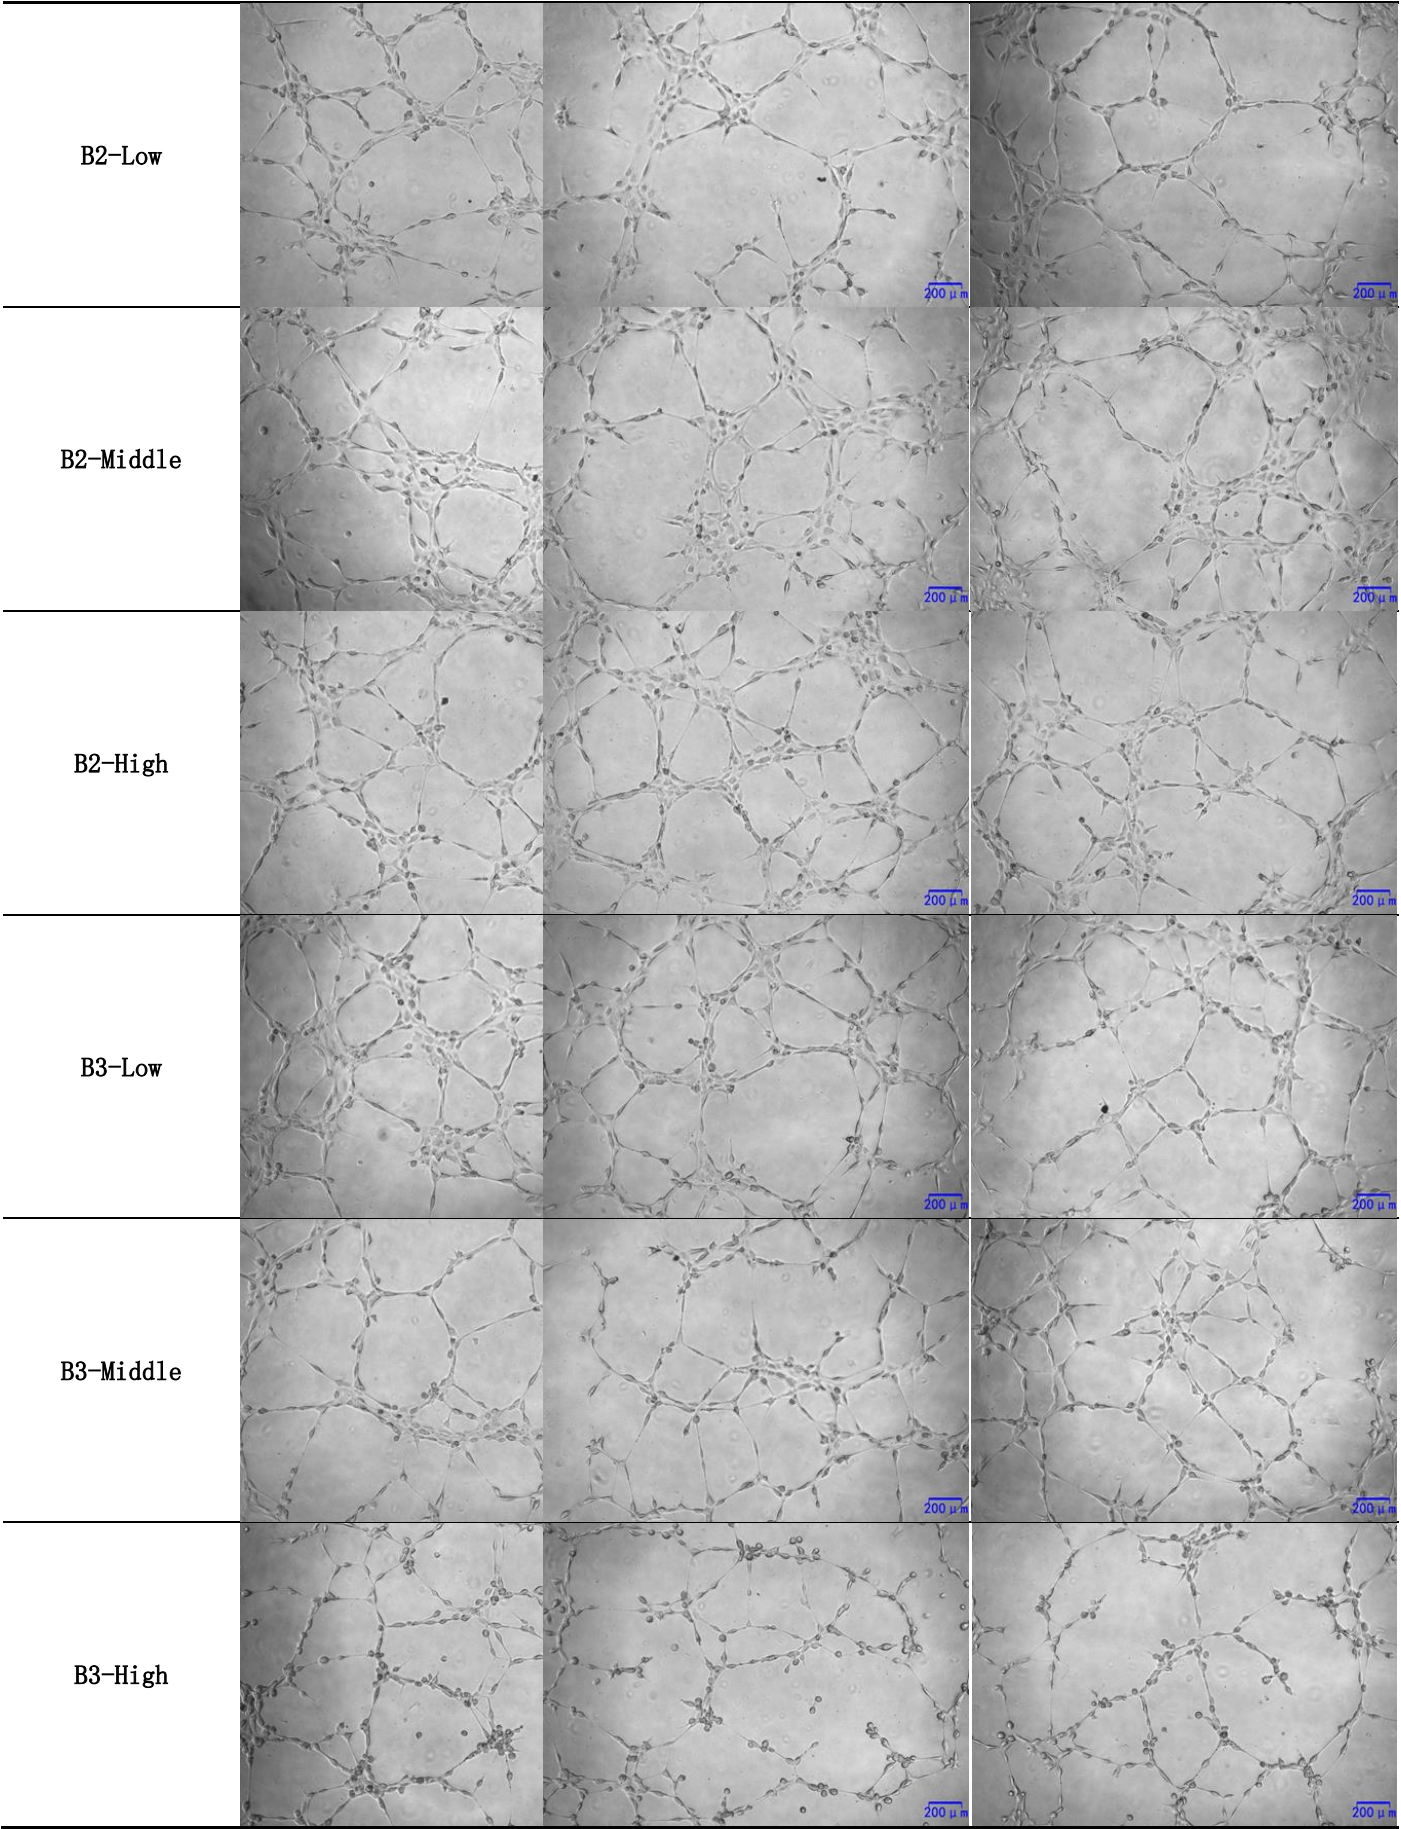



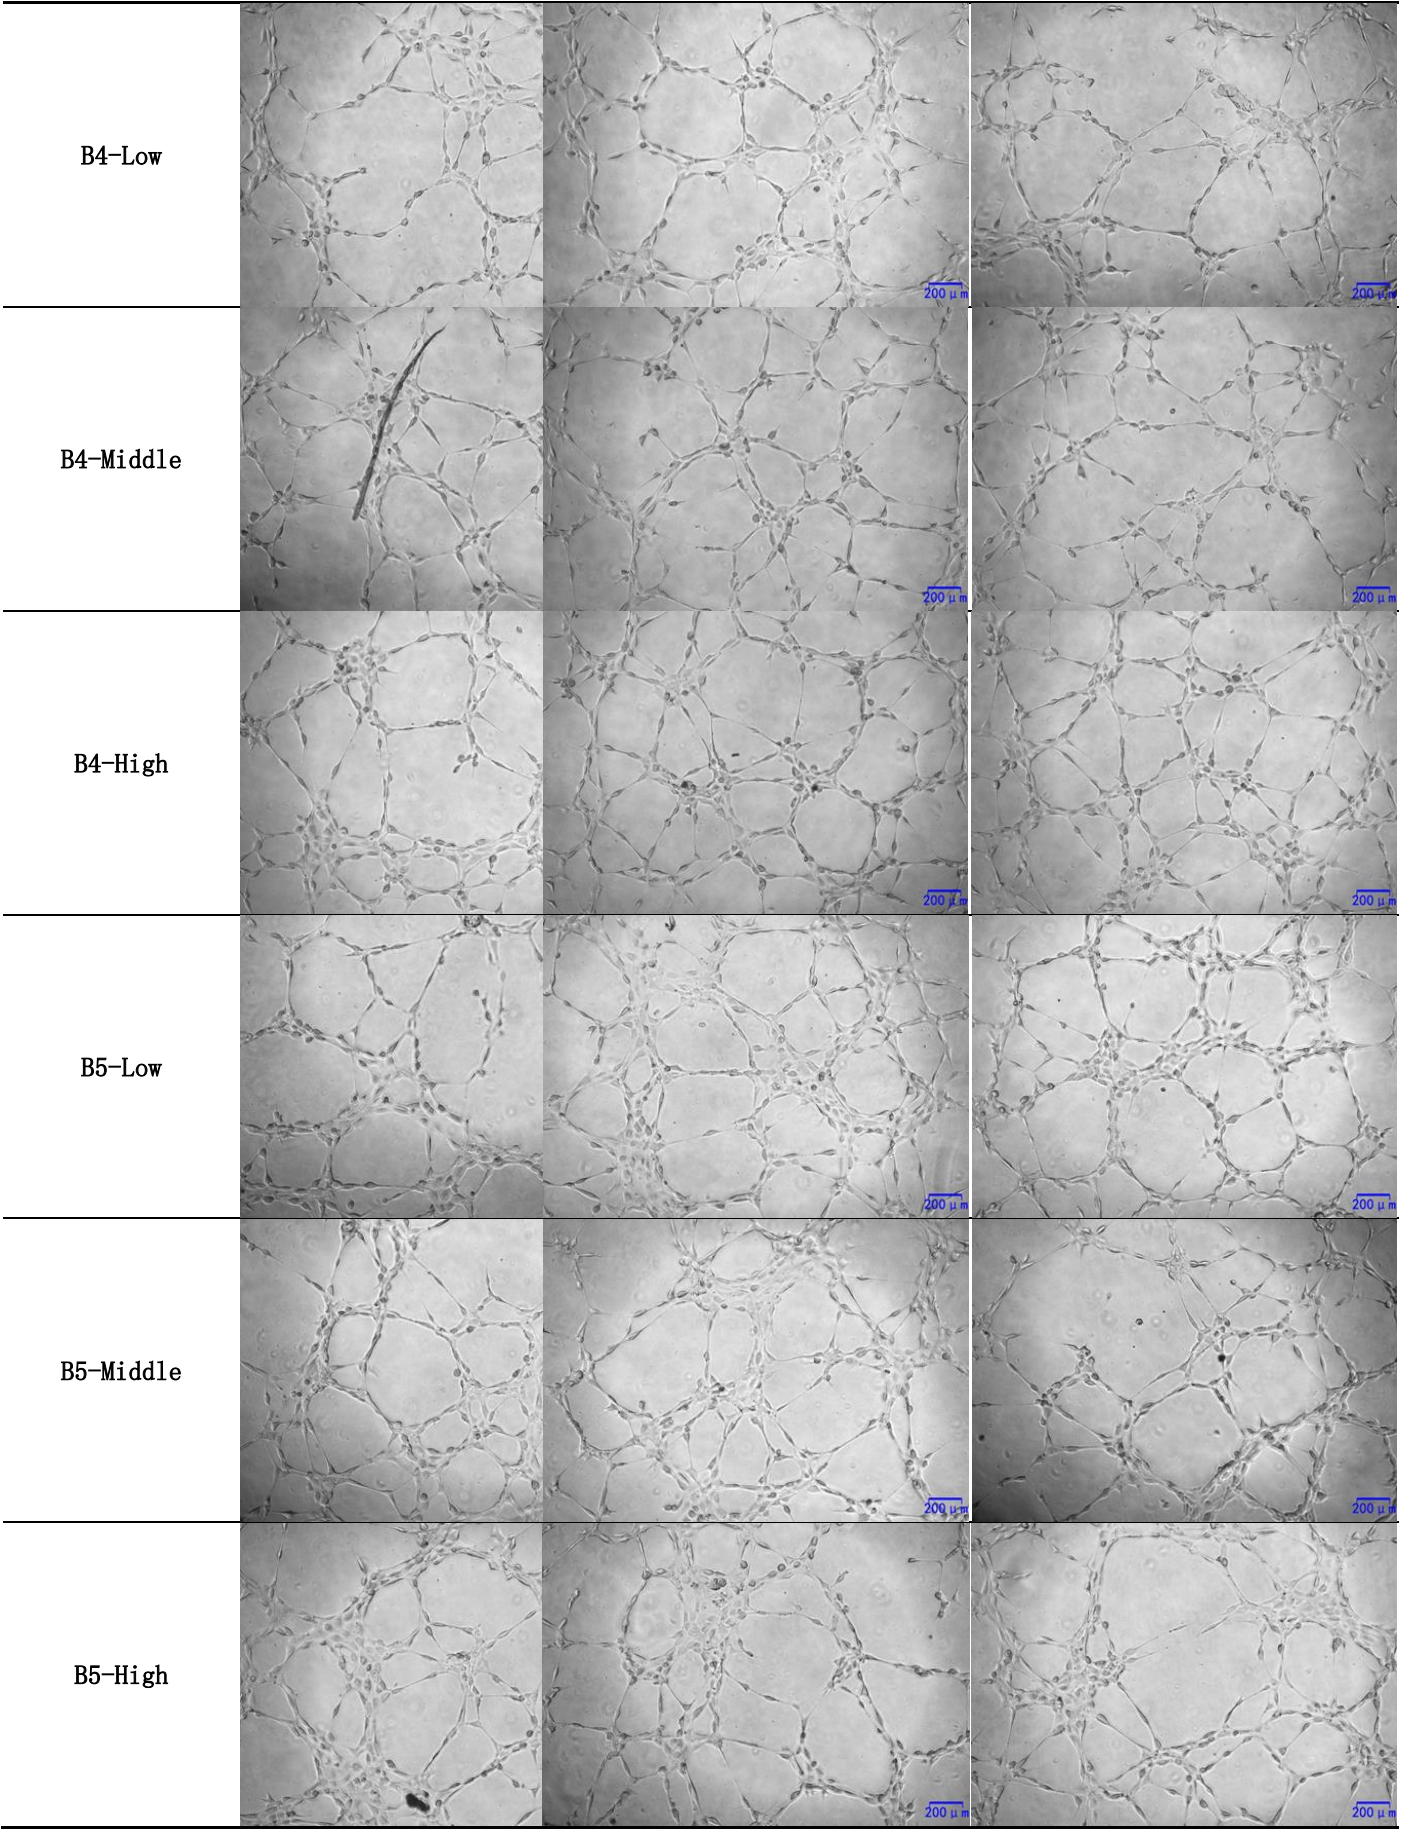



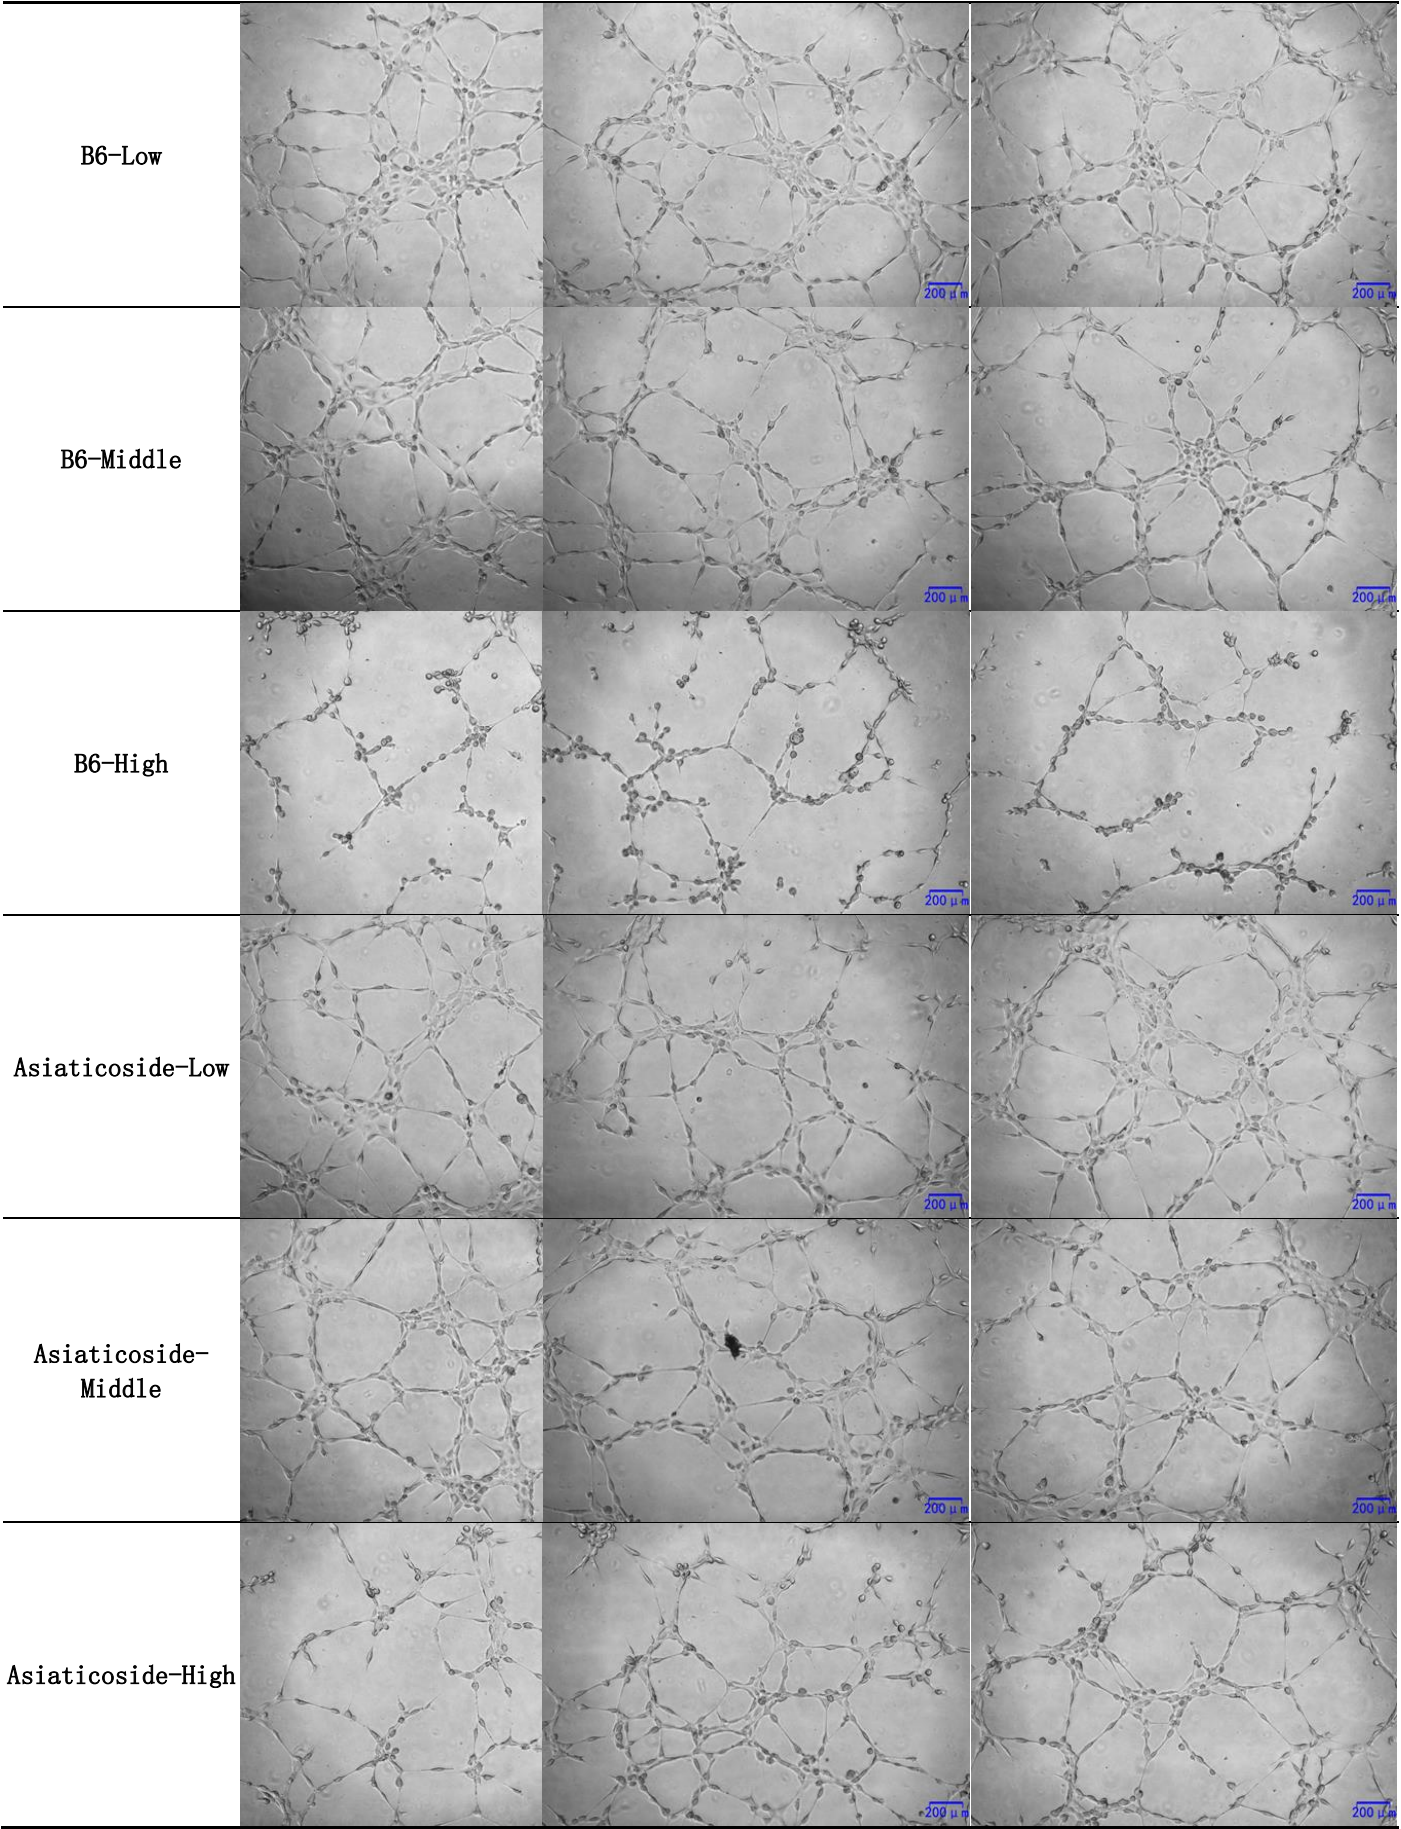



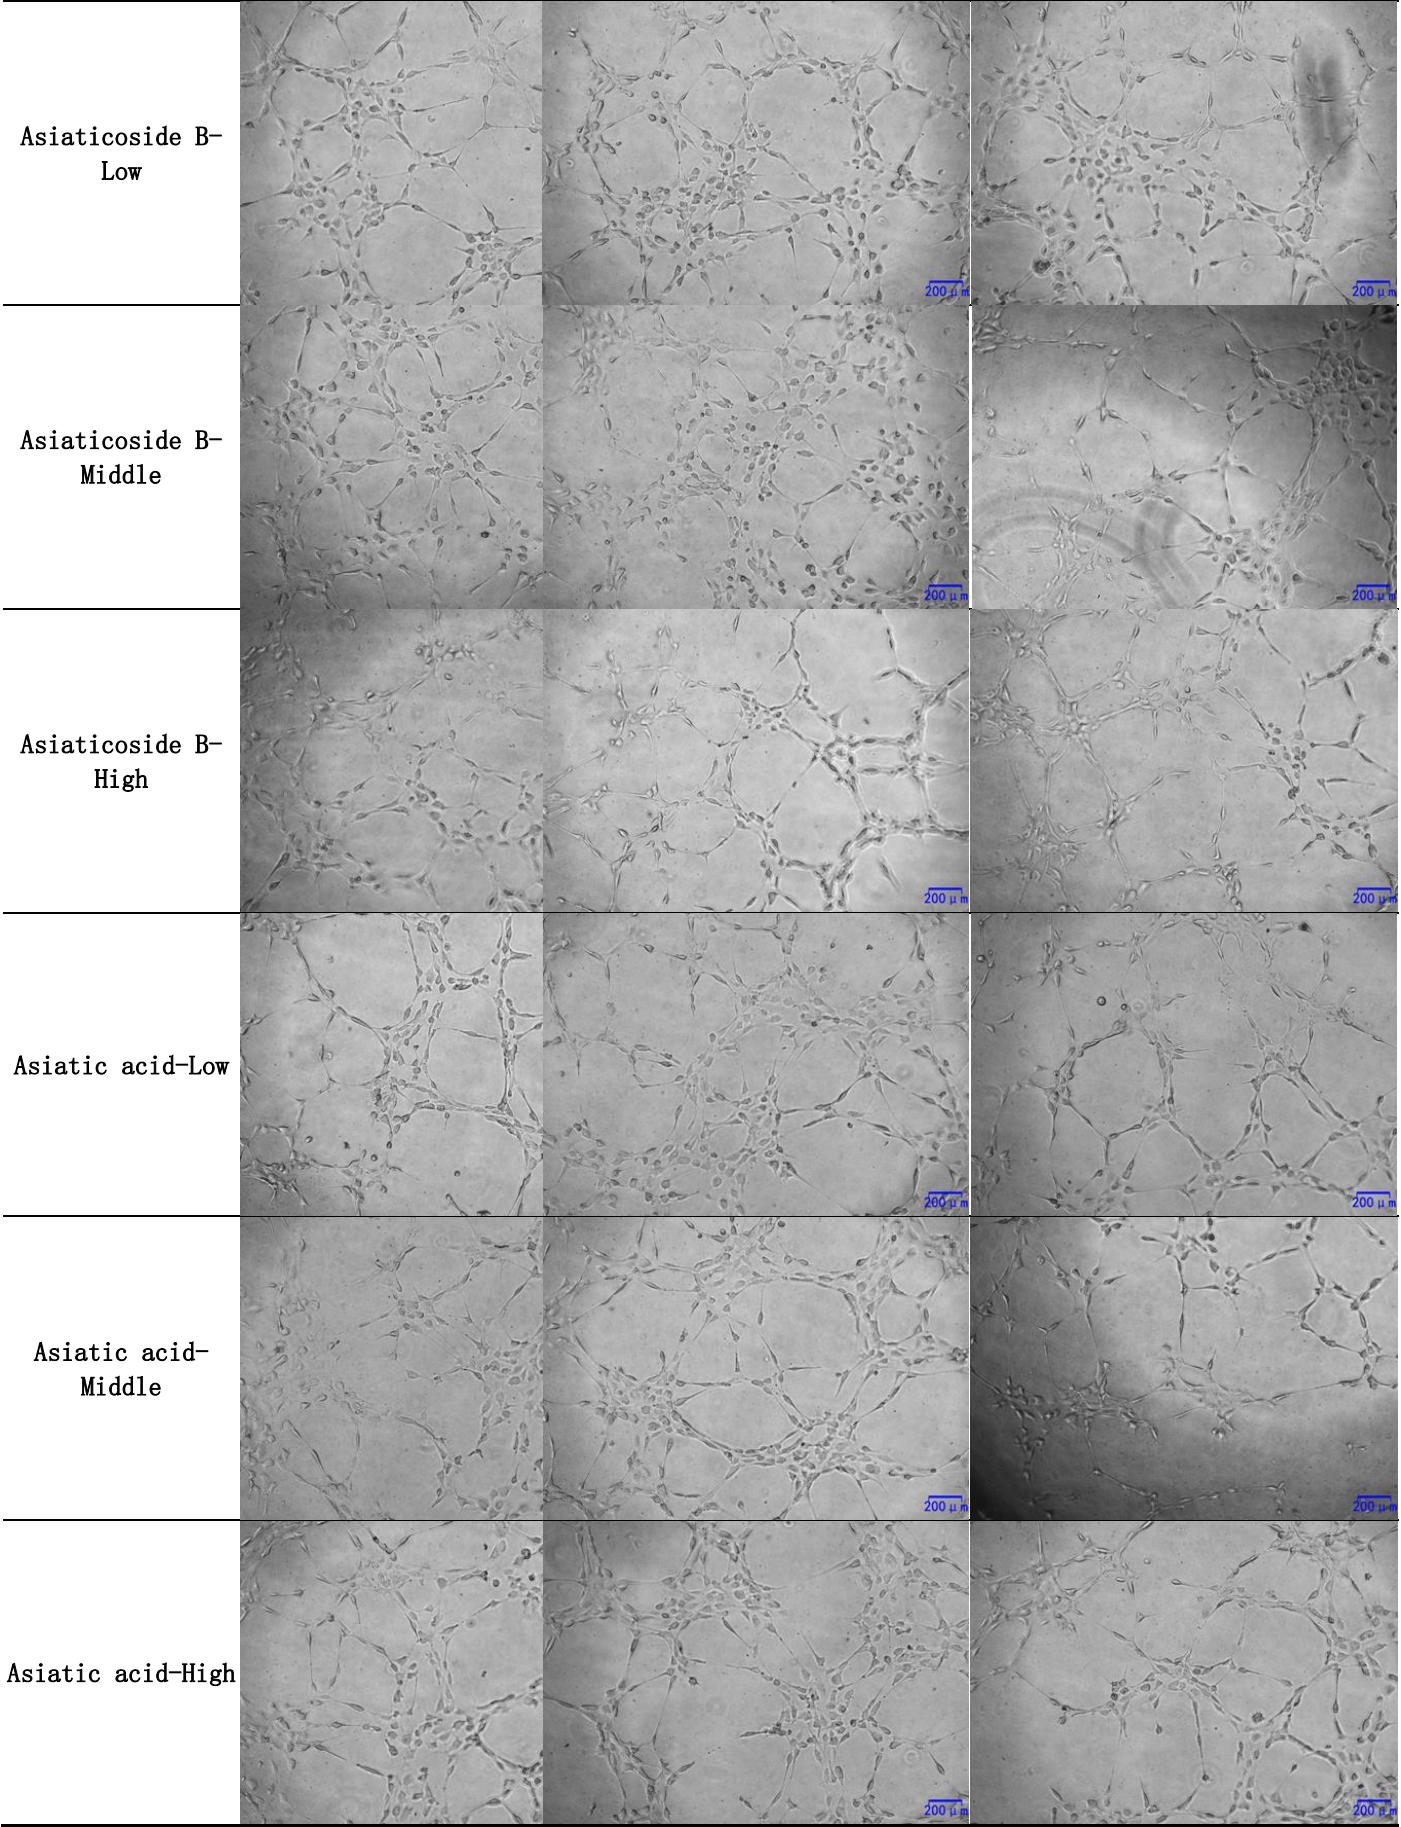



Madecassic acid -  
Low

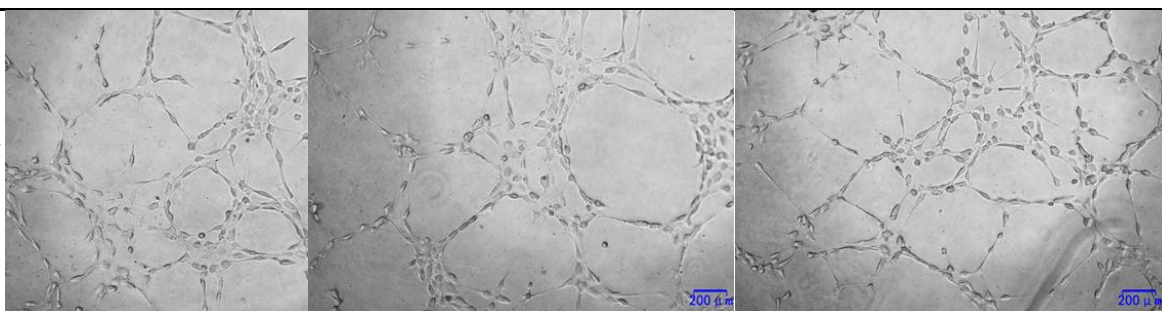

Madecassic acid -  
Middle

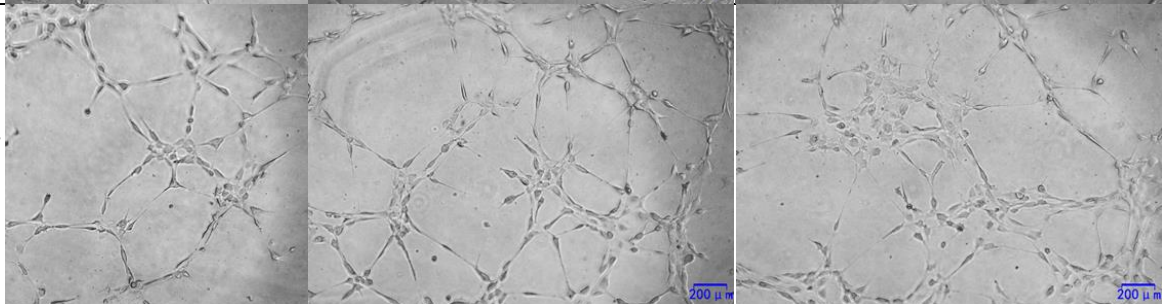

Madecassic acid -  
High

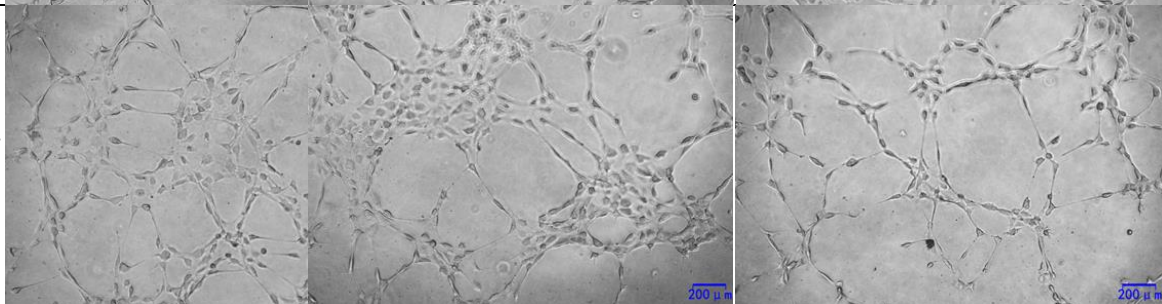

Madecassoside -  
Low

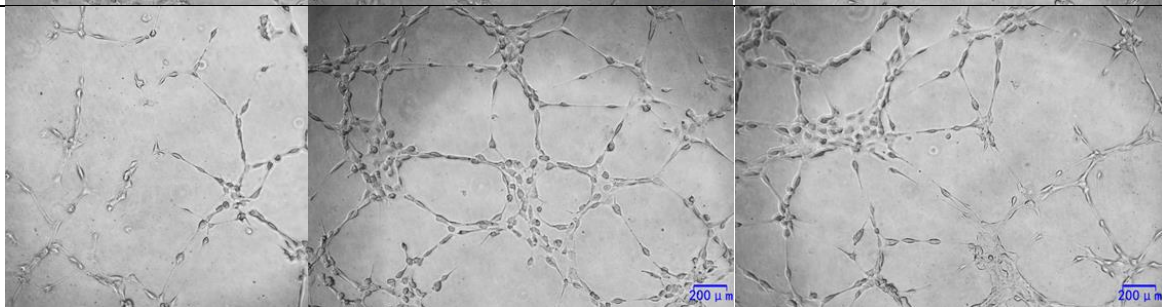

Madecassoside -  
Middle

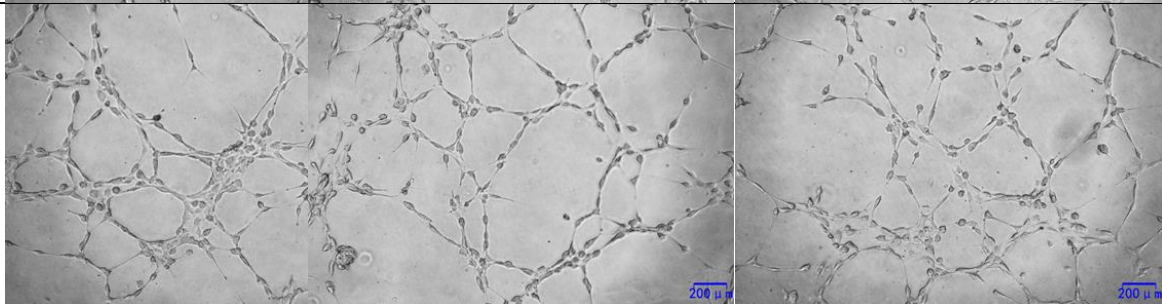

Madecassoside -  
High

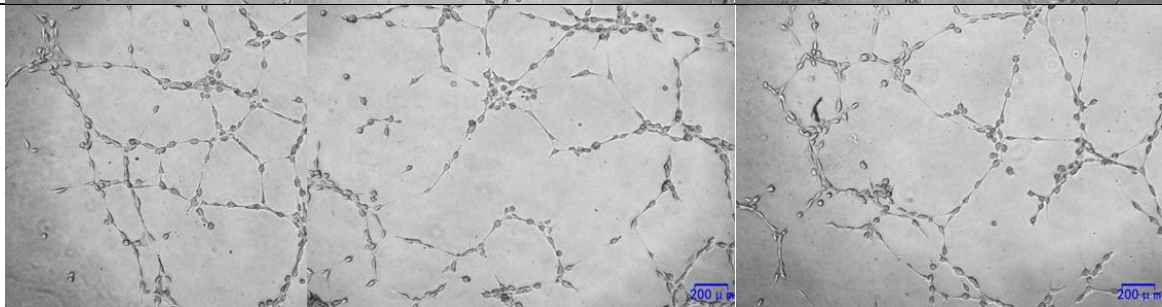



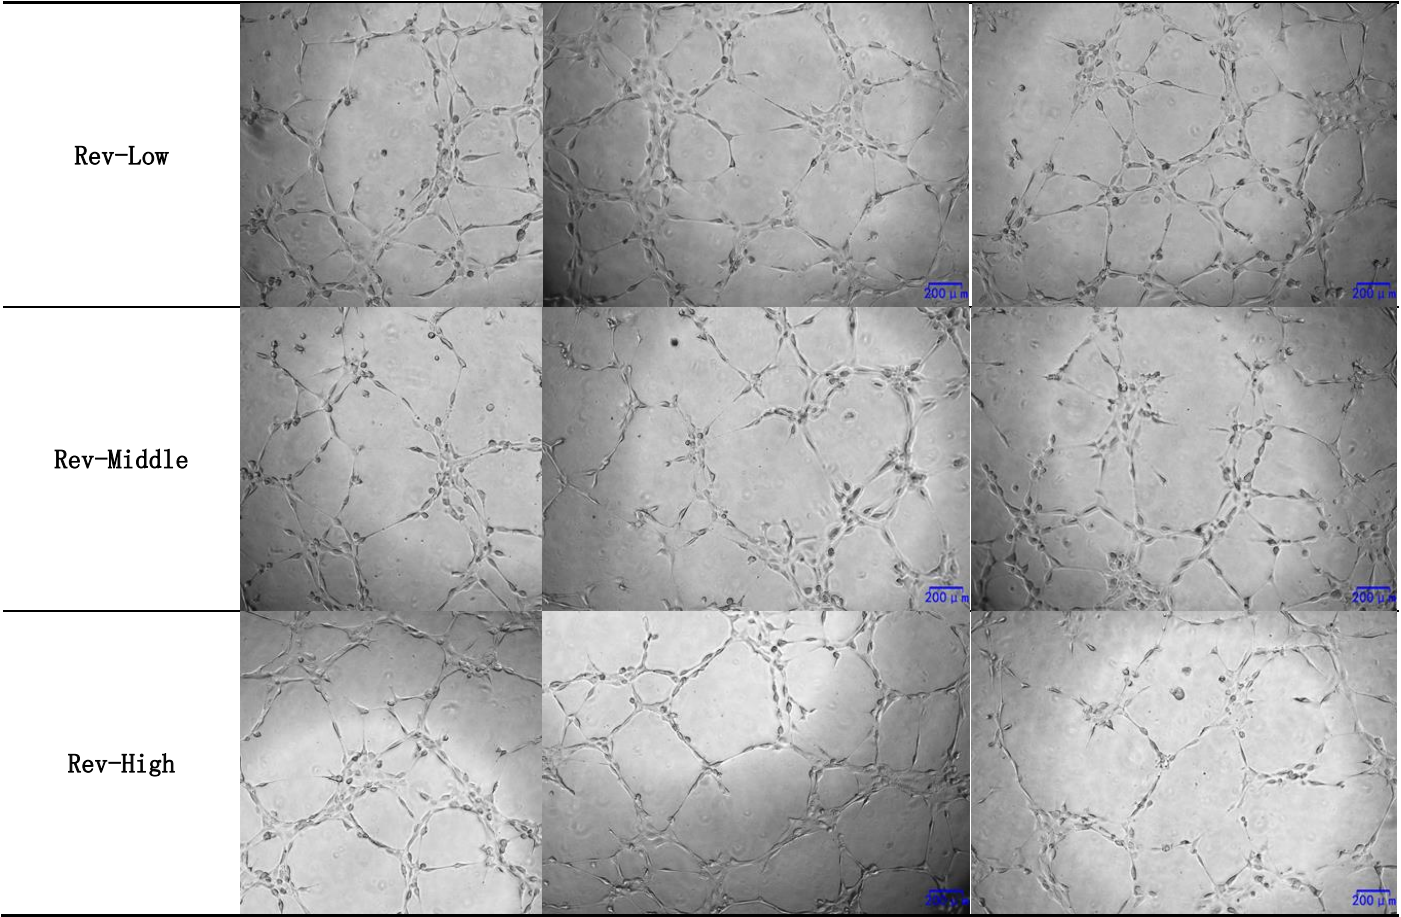

Supplement: s1 [file s1]
